# Supplementary material
Source: PubMed Central journal article supplement (PMC11577279)
Supplement: NIHMS2023896-supplement-Supplemental_Table_1.pdf [file NIHMS2023896-supplement-Supplemental_Table_1.pdf]

## Supplemental Table 1

**Supplemental Table 1: Histological findings and severity scores from Col1a2;MMP-1 mouse**

| Organ                              | Histological Finding                                                               | Severity Score <sup>a</sup> |
|------------------------------------|------------------------------------------------------------------------------------|-----------------------------|
| liver                              | none                                                                               | 0                           |
| kidneys                            | Infiltration, mononuclear, interstitial, multifocal                                | 1                           |
| spleen                             | none                                                                               | 0                           |
| pancreas                           | none                                                                               | 0                           |
| gland (ectopic thyroid) (salivary) | Inflammation, neutrophilic and macrophagic                                         | 3                           |
| peribronchial glands               | Degeneration, epithelial                                                           | 1                           |
| thymus                             | not present on slide                                                               | na                          |
| lung                               | Inflammation, bronchial and interstitial, macrophagic and neutrophilic, multifocal | 2                           |
| stomach                            | none                                                                               | 0                           |
| small intestine                    | none                                                                               | 0                           |
| cecum                              | none                                                                               | 0                           |
| colon                              | none                                                                               | 0                           |
| pancreas and pancreatic duct       | none                                                                               | 0                           |
| testes                             | none                                                                               | 0                           |
| epididymis                         | none                                                                               | 0                           |
| prostate                           | none                                                                               | 0                           |
| seminal vesicles                   | none                                                                               | 0                           |
| brain                              | none                                                                               | 0                           |
| heart                              | none                                                                               | 0                           |
| urinary bladder                    | none                                                                               | 0                           |

a. Severity scoring: 0: lesion not present; 1: mild, 2: moderate, 3: severe

na: not applicable (tissue not present)

The above organs were dissected from Col1a2;MMP-1 mice, embedded in paraffin, sectioned, stained by H&E, and examined for pathological changes.
